# Supplementary material for: Persistence, Adherence, and Switching to Higher-Cost Therapy in Patients with Multiple Sclerosis Initiating Oral Disease-Modifying Therapies: A Retrospective Real-World Study
Source: Springer Nature journal article supplement (doi:10.1007/s40120-022-00404-1), 2022-09-24
Supplement: MOESM1 [file 23534602]

# **Persistence, Adherence, and Switching to Higher-Cost Therapy in Patients with Multiple Sclerosis Initiating Oral Disease-Modifying Therapies: A Retrospective Real-World Study**

## **AUTHORS**

<sup>1\*</sup>Lita Araujo, MSc, PhD; <sup>1</sup>Svend S Geertsen, PhD; <sup>1,2</sup>Allen Amedume, PharmD; <sup>1</sup>Keiko Higuchi, MPH, PhD; <sup>3</sup>Janneke van Wingerden, MSc

## **AUTHORS' AFFILIATIONS**

<sup>1</sup>Sanofi, Cambridge, MA, US

<sup>2</sup>School of Pharmacy, Massachusetts College of Pharmacy and Health Sciences (MCPHS) University, Boston, MA, US

<sup>3</sup>Sanofi, Amsterdam, The Netherlands

\*Corresponding author

Lita Araujo, MSc, PhD, [lita.araujo@sanofi.com](mailto:lita.araujo@sanofi.com) (ORCID ID: 0000-0002-6863-9340)

Svend Sparre Geertsen, PhD, [svend.geertsen@sanofi.com](mailto:svend.geertsen@sanofi.com) (ORCID ID: 0000-0003-4497-3616)

Allen Amedume, PharmD, [allen.amedume@sanofi.com](mailto:allen.amedume@sanofi.com)

Keiko Higuchi, MPH, PhD, [keiko.higuchi@sanofi.com](mailto:keiko.higuchi@sanofi.com)

Janneke van Wingerden, MSc, [janneke.wingerden@sanofi.com](mailto:janneke.wingerden@sanofi.com)

**Supplementary Material Table 1.** National Drug Codes for study DMTs

| <b>Generic name</b> | <b>Brand name</b> | <b>Format</b>           | <b>Dosage</b> | <b>NDCs</b> |
|---------------------|-------------------|-------------------------|---------------|-------------|
| Teriflunomide       | Aubagio           | Tablet                  | 7 mg          | 58468021101 |
|                     |                   |                         |               | 58468021104 |
|                     |                   |                         | 14 mg         | 58468021002 |
|                     |                   |                         |               | 58468021004 |
| Dimethyl fumarate   | Tecfidera         | Delayed-release capsule | 120 mg        | 00378039614 |
|                     |                   |                         |               | 00093921841 |
|                     |                   |                         |               | 24979012721 |
|                     |                   |                         |               | 67877055514 |
|                     |                   |                         |               | 68180077614 |
|                     |                   |                         |               | 16729041604 |
|                     |                   |                         |               | 69238131804 |
|                     |                   |                         |               | 31722065731 |
|                     |                   |                         |               | 69097032289 |
|                     |                   |                         |               | 43598042952 |
|                     |                   |                         | 644060000501  |             |
|                     |                   |                         | 240 mg        | 00378039991 |
|                     |                   |                         |               | 51407044160 |
|                     |                   |                         |               | 00093921906 |
|                     |                   |                         |               | 24979012804 |
|                     |                   |                         |               | 67877055660 |
|                     |                   |                         |               | 68180077707 |
|                     |                   |                         |               | 16729041712 |
|                     |                   |                         |               | 16729041759 |
|                     |                   |                         |               | 69238131906 |
| 31722065832         |                   |                         |               |             |
| 69097032303         |                   |                         |               |             |
| 43598043060         |                   |                         |               |             |
| 644060000602        |                   |                         |               |             |

|                    |           |                         |              |              |
|--------------------|-----------|-------------------------|--------------|--------------|
|                    |           |                         | 120-240 mg   | 67877055739  |
|                    |           |                         |              | 68180077813  |
|                    |           |                         |              | 69238162603  |
|                    |           |                         |              | 31722068060  |
|                    |           |                         |              | 69097055203  |
|                    |           |                         |              | 644060000703 |
| Diroximel fumarate | Vumerity  | Delayed-release capsule | 231 mg       | 644060002003 |
|                    |           |                         |              | 644060002001 |
| Fingolimod         | Gilenya   | Tablet                  | 0.5 mg       | 000780060715 |
|                    |           |                         |              | 000780060751 |
| Cladribine         | Mavenclad | Tablet                  | 10 mg        | 44087040004  |
|                    |           |                         |              | 44087400004  |
|                    |           |                         |              | 44087040005  |
|                    |           |                         |              | 44087400005  |
|                    |           |                         |              | 44087040006  |
|                    |           |                         |              | 44087400006  |
|                    |           |                         |              | 44087040007  |
|                    |           |                         |              | 44087400007  |
|                    |           |                         |              | 44087040008  |
|                    |           |                         |              | 44087400008  |
|                    |           |                         |              | 44087040009  |
|                    |           |                         |              | 44087400009  |
|                    |           |                         |              | 44087040010  |
|                    |           |                         |              | 44087400000  |
| Natalizumab        | Tysabri   | Injectable              | 300 mg/15 mL | 590750073015 |
|                    |           |                         |              | 644060000801 |
| Ocrelizumab        | Ocrevus   | Injectable              | 300 mg/10 mL | 502420015001 |

NDC, national drug code; DMT, disease-modifying therapy.

**Supplementary Material Table 2.** Procedure codes for DMTs administered in the clinical setting

| <b>Generic name</b> | <b>Procedure code</b>  |
|---------------------|------------------------|
| Natalizumab         | C9126 (injection)      |
|                     | J2323 (injection, 1mg) |
| Ocrelizumab         | J2350 (injection, 1mg) |
|                     | C9494 (injection, 1mg) |

DMT, disease-modifying therapy.
